# Supplementary material for: Lipopolysaccharide (LPS) Inner-Core Phosphates Are Required for Complete LPS Synthesis and Transport to the Outer Membrane in Pseudomonas aeruginosa PAO1
Source: PubMed Central journal article supplement — mBio. 2011 Aug 2;2(4):e00142-11. doi: 10.1128/mBio.00142-11 (PMC3147165; doi:10.1128/mbio.00142-11), 2011-08-02
Supplement: mbo004111145sf05.pdf [file mbo004111145sf05.pdf]

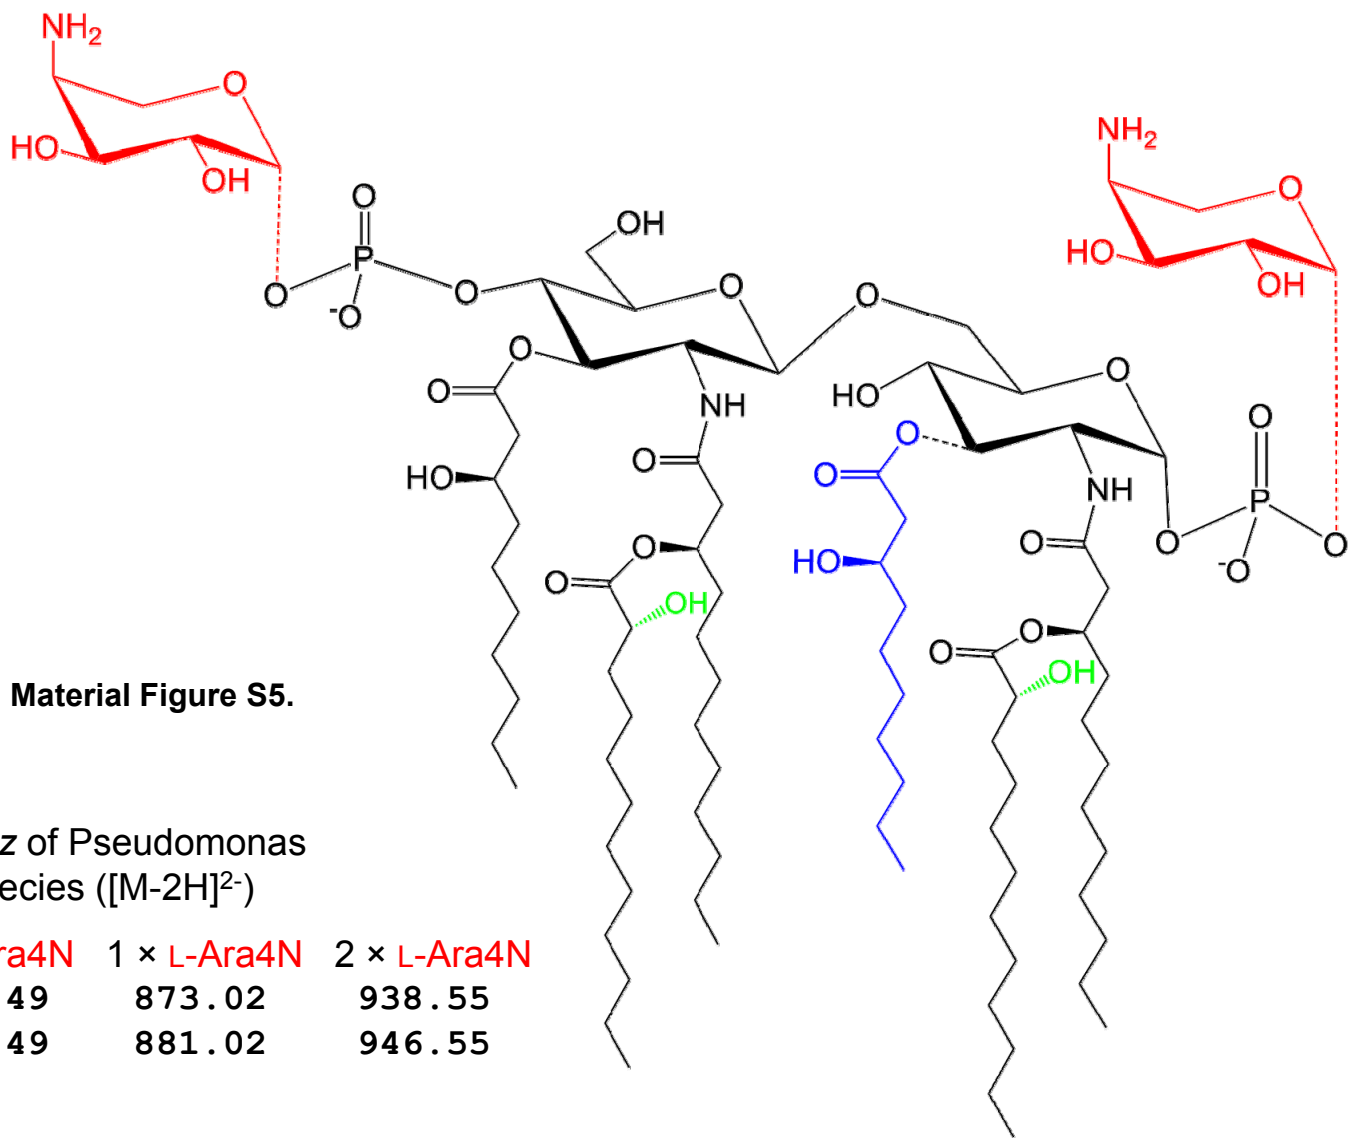

Supplemental Material Figure S5.

Calculated  $m/z$  of *Pseudomonas*  
Lipid A Species ( $[M-2H]^{2-}$ )

|                    |          | No L-Ara4N | 1 × L-Ara4N | 2 × L-Ara4N |
|--------------------|----------|------------|-------------|-------------|
| Lipid A            | (1 × OH) | 807.49     | 873.02      | 938.55      |
|                    | (2 × OH) | 815.49     | 881.02      | 946.55      |
| 3-O-deacyl-lipid A | (1 × OH) | 722.42     | 787.96      | 853.48      |
|                    | (2 × OH) | 730.42     | 795.96      | 861.48      |
