# Supplementary material for: Lipopolysaccharide (LPS) Inner-Core Phosphates Are Required for Complete LPS Synthesis and Transport to the Outer Membrane in Pseudomonas aeruginosa PAO1
Source: PubMed Central journal article supplement — mBio. 2011 Aug 2;2(4):e00142-11. doi: 10.1128/mBio.00142-11 (PMC3147165; doi:10.1128/mbio.00142-11), 2011-08-02
Supplement: mbo004111145st1.pdf [file mbo004111145st1.pdf]

**Supplemental Material Table S1.** Observed masses and proposed compositions for full-length cores observed by ESI-MS

| Strain                              | Proposed structure <sup>b</sup>                                                        | Calculated ( <i>m/z</i> ) | Observed ( <i>m/z</i> ) <sup>a</sup> |
|-------------------------------------|----------------------------------------------------------------------------------------|---------------------------|--------------------------------------|
| PAO1                                |                                                                                        |                           |                                      |
|                                     | [RhaGlc <sub>3</sub> GalN(Ala)Hep(Cm)HepP <sub>3</sub> anhydroKdo-2H] <sup>2-</sup>    | 874.70                    | 874.7                                |
|                                     | [RhaGlc <sub>3</sub> GalN(Ala)Hep(Cm)HepP <sub>4</sub> anhydroKdo-3H+Na] <sup>2-</sup> | 925.67                    | 925.7                                |
|                                     | [RhaGlc <sub>4</sub> GalN(Ala)Hep(Cm)HepP <sub>2</sub> Kdo-2H] <sup>2-</sup>           | 924.73                    | 924.8                                |
|                                     | [RhaGlc <sub>4</sub> GalN(Ala)Hep(Cm)HepP <sub>3</sub> Kdo-2H] <sup>2-</sup>           | 964.73                    | 964.8                                |
|                                     | [RhaGlc <sub>4</sub> GalN(Ala)Hep(Cm)HepP <sub>3</sub> Kdo-3H+Na] <sup>2-</sup>        | 975.72                    | 975.8                                |
|                                     | [RhaGlc <sub>4</sub> GalN(Ala)Hep(Cm)HepP <sub>3</sub> anhydroKdo-2H] <sup>2-</sup>    | 955.73                    | 955.8                                |
|                                     | [RhaGlc <sub>4</sub> GalN(Ala)Hep(Cm)HepP <sub>3</sub> anhydroKdo-3H+Na] <sup>2-</sup> | 966.72                    | 966.7                                |
|                                     | [RhaGlc <sub>4</sub> GalN(Ala)Hep(Cm)HepP <sub>4</sub> Kdo-3H+Na] <sup>2-</sup>        | 1015.71                   | 1015.7                               |
|                                     | [RhaGlc <sub>4</sub> GalN(Ala)Hep(Cm)HepP <sub>4</sub> anhydroKdo-2H] <sup>2-</sup>    | 995.71                    | 995.7                                |
|                                     | [RhaGlc <sub>4</sub> GalN(Ala)Hep(Cm)HepP <sub>4</sub> anhydroKdo-3H+Na] <sup>2-</sup> | 1006.70                   | 1006.7                               |
| CDR0031 (WaaP-depleted)             |                                                                                        |                           |                                      |
|                                     | [RhaGlc <sub>3</sub> GalN(Ala)Hep(Cm)HepP <sub>3</sub> anhydroKdo-2H] <sup>2-</sup>    | 874.70                    | 874.7                                |
|                                     | [RhaGlc <sub>4</sub> GalN(Ala)Hep(Cm)HepP <sub>3</sub> Kdo-2H] <sup>2-</sup>           | 964.73                    | 964.8                                |
|                                     | [RhaGlc <sub>4</sub> GalN(Ala)Hep(Cm)HepP <sub>3</sub> anhydroKdo-2H] <sup>2-</sup>    | 955.73                    | 955.8                                |
|                                     | [RhaGlc <sub>4</sub> GalN(Ala)Hep(Cm)HepP <sub>3</sub> anhydroKdo-3H+Na] <sup>2-</sup> | 966.72                    | 966.7                                |
|                                     | [RhaGlc <sub>4</sub> GalN(Ala)Hep(Cm)HepP <sub>4</sub> Kdo-3H+Na] <sup>2-</sup>        | 1015.71                   | 1015.7                               |
|                                     | [RhaGlc <sub>4</sub> GalN(Ala)Hep(Cm)HepP <sub>4</sub> anhydroKdo-3H+Na] <sup>2-</sup> | 1006.70                   | 1006.7                               |
| CDR0060 (WapP/WapQ/PA5006-depleted) |                                                                                        |                           |                                      |
|                                     | [RhaGlc <sub>3</sub> GalN(Ala)Hep(Cm)HepP <sub>3</sub> anhydroKdo-2H] <sup>2-</sup>    | 874.70                    | 874.7                                |
|                                     | [RhaGlc <sub>3</sub> GalN(Ala)Hep(Cm)HepP <sub>3</sub> Kdo-2H] <sup>2-</sup>           | 883.70                    | 883.7                                |
|                                     | [RhaGlc <sub>3</sub> GalN(Ala)Hep(Cm)HepP <sub>3</sub> anhydroKdo-3H+Na] <sup>2-</sup> | 885.69                    | 885.7                                |
|                                     | [RhaGlc <sub>3</sub> GalN(Ala)Hep(Cm)HepP <sub>4</sub> anhydroKdo-3H+Na] <sup>2-</sup> | 925.67                    | 925.7                                |
|                                     | [RhaGlc <sub>4</sub> GalN(Ala)Hep(Cm)HepP <sub>2</sub> Kdo-2H] <sup>2-</sup>           | 924.73                    | 924.8                                |
|                                     | [RhaGlc <sub>4</sub> GalN(Ala)Hep(Cm)HepP <sub>2</sub> anhydroKdo-2H] <sup>2-</sup>    | 915.73                    | 915.8                                |
|                                     | [RhaGlc <sub>4</sub> GalN(Ala)Hep(Cm)HepP <sub>3</sub> Kdo-2H] <sup>2-</sup>           | 964.73                    | 964.8                                |
|                                     | [RhaGlc <sub>4</sub> GalN(Ala)Hep(Cm)HepP <sub>3</sub> Kdo-3H+Na] <sup>2-</sup>        | 975.72                    | 975.8                                |
|                                     | [RhaGlc <sub>4</sub> GalN(Ala)Hep(Cm)HepP <sub>3</sub> anhydroKdo-2H] <sup>2-</sup>    | 955.73                    | 955.8                                |
|                                     | [RhaGlc <sub>4</sub> GalN(Ala)Hep(Cm)HepP <sub>3</sub> anhydroKdo-3H+Na] <sup>2-</sup> | 966.72                    | 966.7                                |
|                                     | [RhaGlc <sub>4</sub> GalN(Ala)Hep(Cm)HepP <sub>4</sub> Kdo-3H+Na] <sup>2-</sup>        | 1015.71                   | 1015.7                               |
|                                     | [RhaGlc <sub>4</sub> GalN(Ala)Hep(Cm)HepP <sub>4</sub> anhydroKdo-3H+Na] <sup>2-</sup> | 1006.70                   | 1006.7                               |
|                                     | [RhaGlc <sub>4</sub> GalN(Ala)Hep(Cm)HepP <sub>5</sub> anhydroKdo-3H+Na] <sup>2-</sup> | 1046.68                   | 1046.7                               |

<sup>a</sup>Peaks identified by negative ion ESI-MS with an *m/z* scan (60-2200) were subject to enhanced resolution ESI-MS to determine exact mass and charge state (not shown). Only assignable peaks with unambiguous exact masses and charge states are listed.

<sup>b</sup>A second Kdo residue, which is cleaved as a result of acid hydrolysis during core preparation (7) would be present in the intact core.
