# Supplementary material for: Lipopolysaccharide (LPS) Inner-Core Phosphates Are Required for Complete LPS Synthesis and Transport to the Outer Membrane in Pseudomonas aeruginosa PAO1
Source: PubMed Central journal article supplement — mBio. 2011 Aug 2;2(4):e00142-11. doi: 10.1128/mBio.00142-11 (PMC3147165; doi:10.1128/mbio.00142-11), 2011-08-02
Supplement: mbo004111145st2.pdf [file mbo004111145st2.pdf]

## Supplemental Material Table S2. Bacterial strains and plasmids

| Strain or plasmid           | Relevant characteristic*                                                                                            | Reference or source |
|-----------------------------|---------------------------------------------------------------------------------------------------------------------|---------------------|
| <b><i>P. aeruginosa</i></b> |                                                                                                                     |                     |
| K767                        | PAO1, Prototroph                                                                                                    | (3)                 |
| CDR0031                     | K767 with pBAD-regulated <i>waaP</i> (132 bp untranslated leader sequence), Gm <sup>r</sup>                         | This study          |
| CDR0060                     | K767 with pBAD- regulated <i>wapP</i> , <i>wapQ</i> , PA5006 (132-bp untranslated leader sequence), Cb <sup>r</sup> | This study          |
| PAO1 <i>galU</i>            | PAO1 <i>galU::aacC1</i> , Gm <sup>r</sup>                                                                           | (2)                 |
| <b><i>E. coli</i></b>       |                                                                                                                     |                     |
| One Shot® TOP10 S17-1       | Donor strain for transfer of plasmids into <i>P. aeruginosa</i>                                                     | Invitrogen (9)      |
| <b>Plasmids</b>             |                                                                                                                     |                     |
| pGA18-pBAD                  | Source of <i>araC</i>                                                                                               | GeneArt AG          |
| pBAD18                      | Arabinose inducible expression vector, Ap <sup>r</sup> , Cb <sup>r</sup>                                            | (4)                 |
| pBAD18M2                    | pBAD vector with modified RBS                                                                                       | This study          |
| pRC7                        | pMini-CTX with pBAD-modified RBS sequence, Tc <sup>r</sup>                                                          | This study          |
| pRC8                        | pMini-CTX derivative with regulated copy of <i>waaP</i> (132-bp leader), Tc <sup>r</sup>                            | This study          |
| pRC10                       | pEX18Tc derivative with <i>aacC1</i> insertion in <i>waaP</i>                                                       | This study          |
| pFLP2                       | Flp recombinase                                                                                                     | (5)                 |
| pMini-CTX- <i>lux</i>       | Source of pMini-CTX backbone vector                                                                                 | (1)                 |
| pEX18Tc                     | Suicide vector, <i>sacB</i> , Tc <sup>r</sup>                                                                       | (5)                 |
| pUCGm                       | Source of <i>aacC1</i>                                                                                              | (8)                 |
| pBAD18M2- <i>waaP</i>       | pBAD18M2 with <i>waaP</i> and 132-bp untranslated leader sequence                                                   | This study          |
| pMMB206                     | Low-copy <i>P. aeruginosa</i> vector, Cm <sup>r</sup>                                                               | (6)                 |

\* Abbreviations for antibiotics: Gm, gentamicin; Cb, carbenicillin; Tc, tetracycline; Cm, chloramphenicol; Km, kanamycin; r, resistant
