# Supplementary material for: Lipopolysaccharide (LPS) Inner-Core Phosphates Are Required for Complete LPS Synthesis and Transport to the Outer Membrane in Pseudomonas aeruginosa PAO1
Source: PubMed Central journal article supplement — mBio. 2011 Aug 2;2(4):e00142-11. doi: 10.1128/mBio.00142-11 (PMC3147165; doi:10.1128/mbio.00142-11), 2011-08-02
Supplement: mbo004111145st3.pdf [file mbo004111145st3.pdf]

**Supplementary Material Table S3. Oligonucleotide Primers**

| Primer Name | Oligonucleotide Sequence <sup>a</sup>             |
|-------------|---------------------------------------------------|
| waaPupHind  | 5'-AGA <u>AAGCTT</u> CCTGCTCGCGGAAATGCTGGAGGAC-3' |
| waaPrevXmaI | 5'-GAC <u>CCGGG</u> CACGCTATCGAGGCTACCGAAGTC-3'   |
| waaPforHind | 5'-GATA <u>AAGCTT</u> CACGCTATCGAGGCTACCGAAGTC-3' |
| waaPrevBam  | 5'-GAT <u>GGATCC</u> TTCGAGCAGGACAGTCTC-3'        |
| waaPXhoI    | 5'-GAGGACGTTTCGCGCCAGTCCTG-3'                     |
| araC        | 5'-TGACCGCGAATGGTGAGATTGAG-3'                     |
| waaPoutr    | 5'-CAGGCCGAGCGTTTCCATCTGCTG -3'                   |
| waaPoutf    | 5'-CGACAGGTGGTACTTGGCCACC -3'                     |

<sup>a</sup>The restriction endonuclease sites are underlined.
