# Supplementary figures and images for: Lipopolysaccharide (LPS) Inner-Core Phosphates Are Required for Complete LPS Synthesis and Transport to the Outer Membrane in Pseudomonas aeruginosa PAO1
Source: PubMed Central journal article supplement — mBio. 2011 Aug 2;2(4):e00142-11. doi: 10.1128/mBio.00142-11 (PMC3147165; doi:10.1128/mbio.00142-11), 2011-08-02

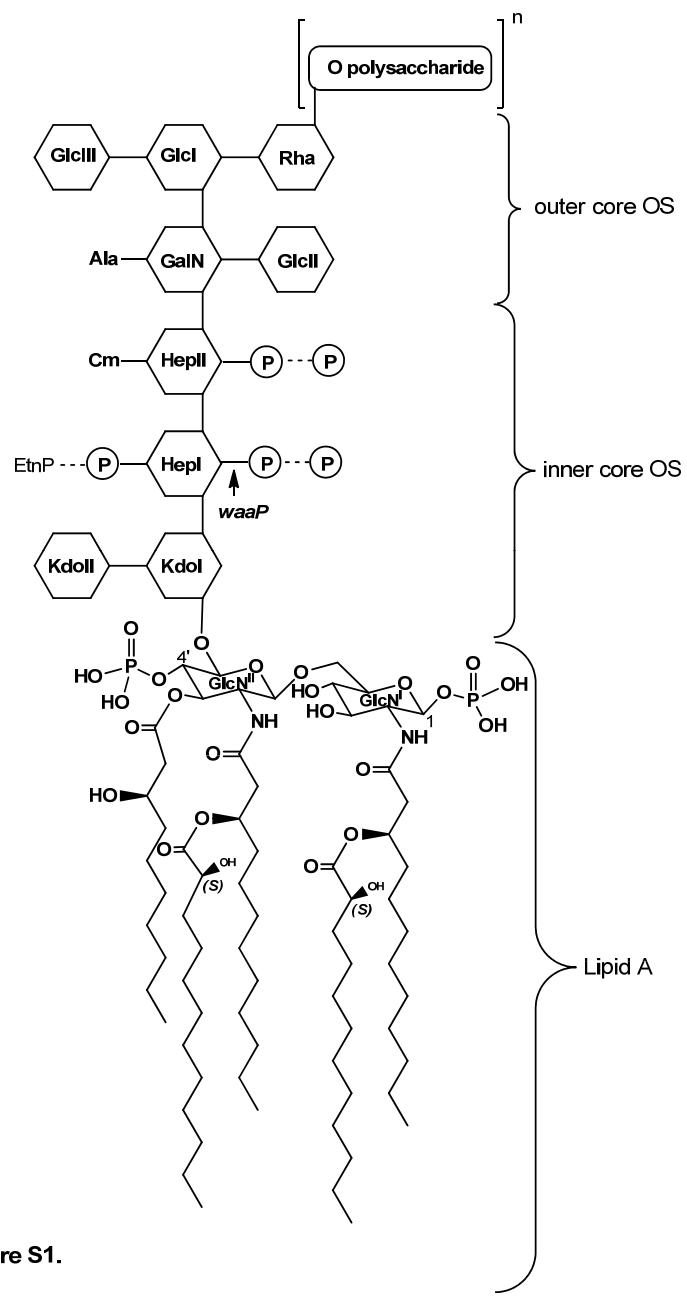

Figure S1.

Supplement: mbo004111145sf01.pdf [file mbo004111145sf01.pdf]

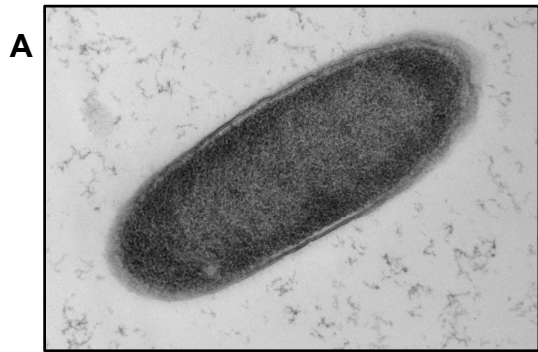

wildtype PAO1

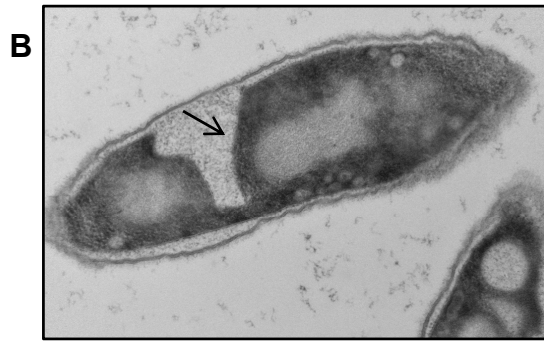

CDR0031 (- Ara)

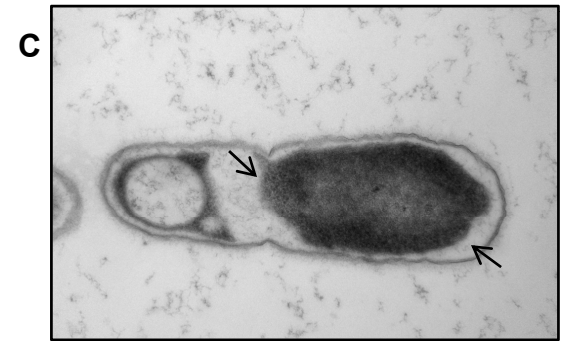

CDR0060 (- Ara)

**Supplemental Material S2.**

Supplement: mbo004111145sf02.pdf [file mbo004111145sf02.pdf]

Supplemental  
Material Figure S3.

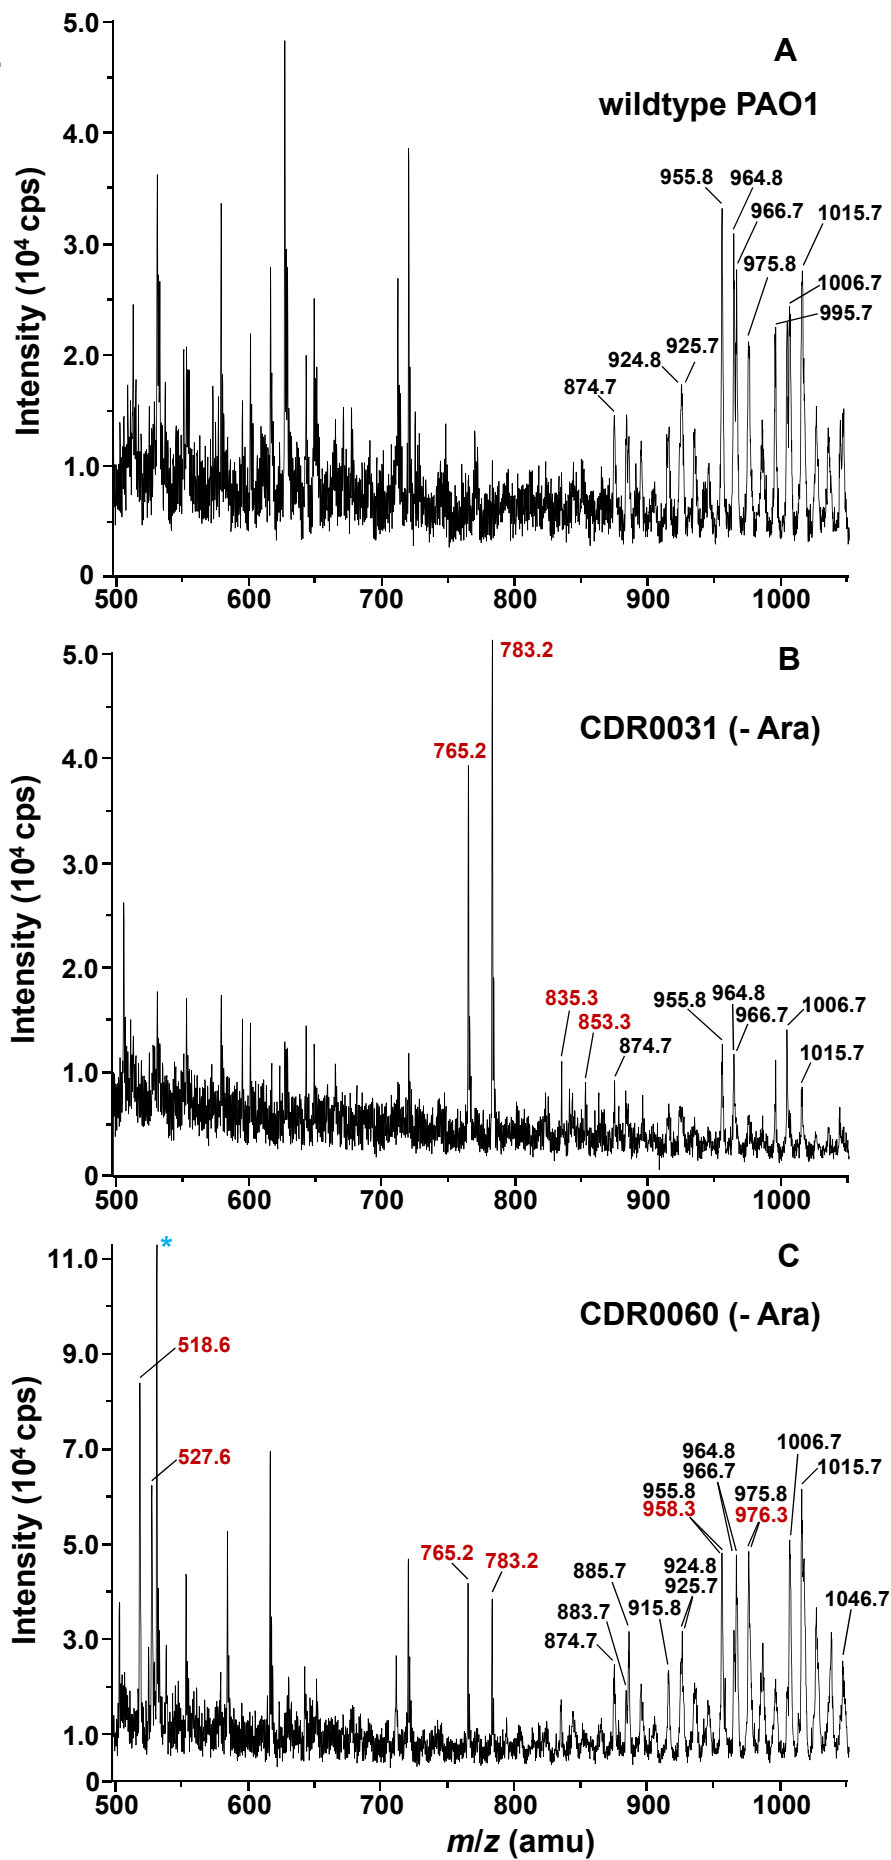

Supplement: mbo004111145sf03.pdf [file mbo004111145sf03.pdf]

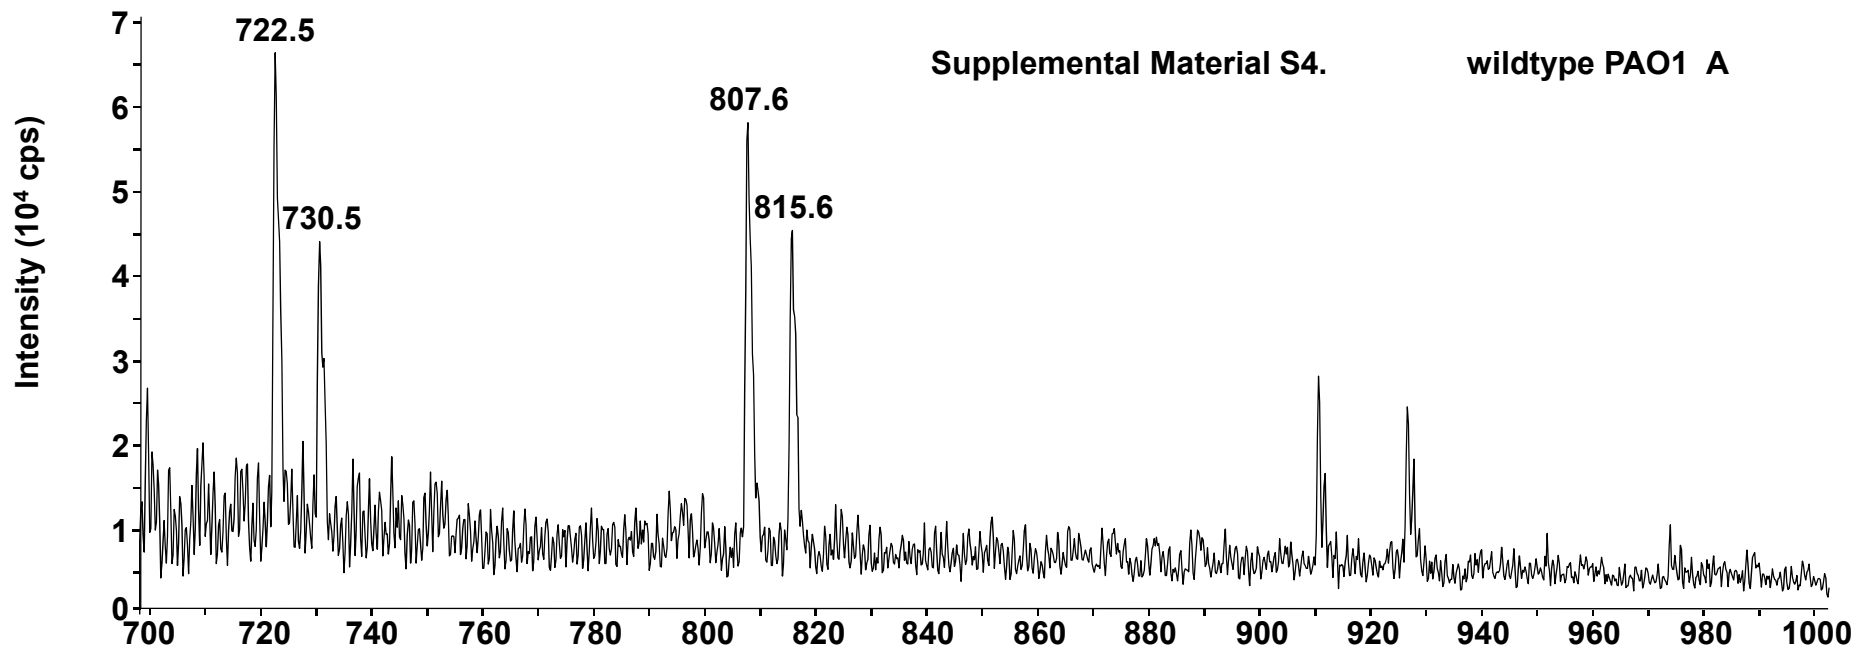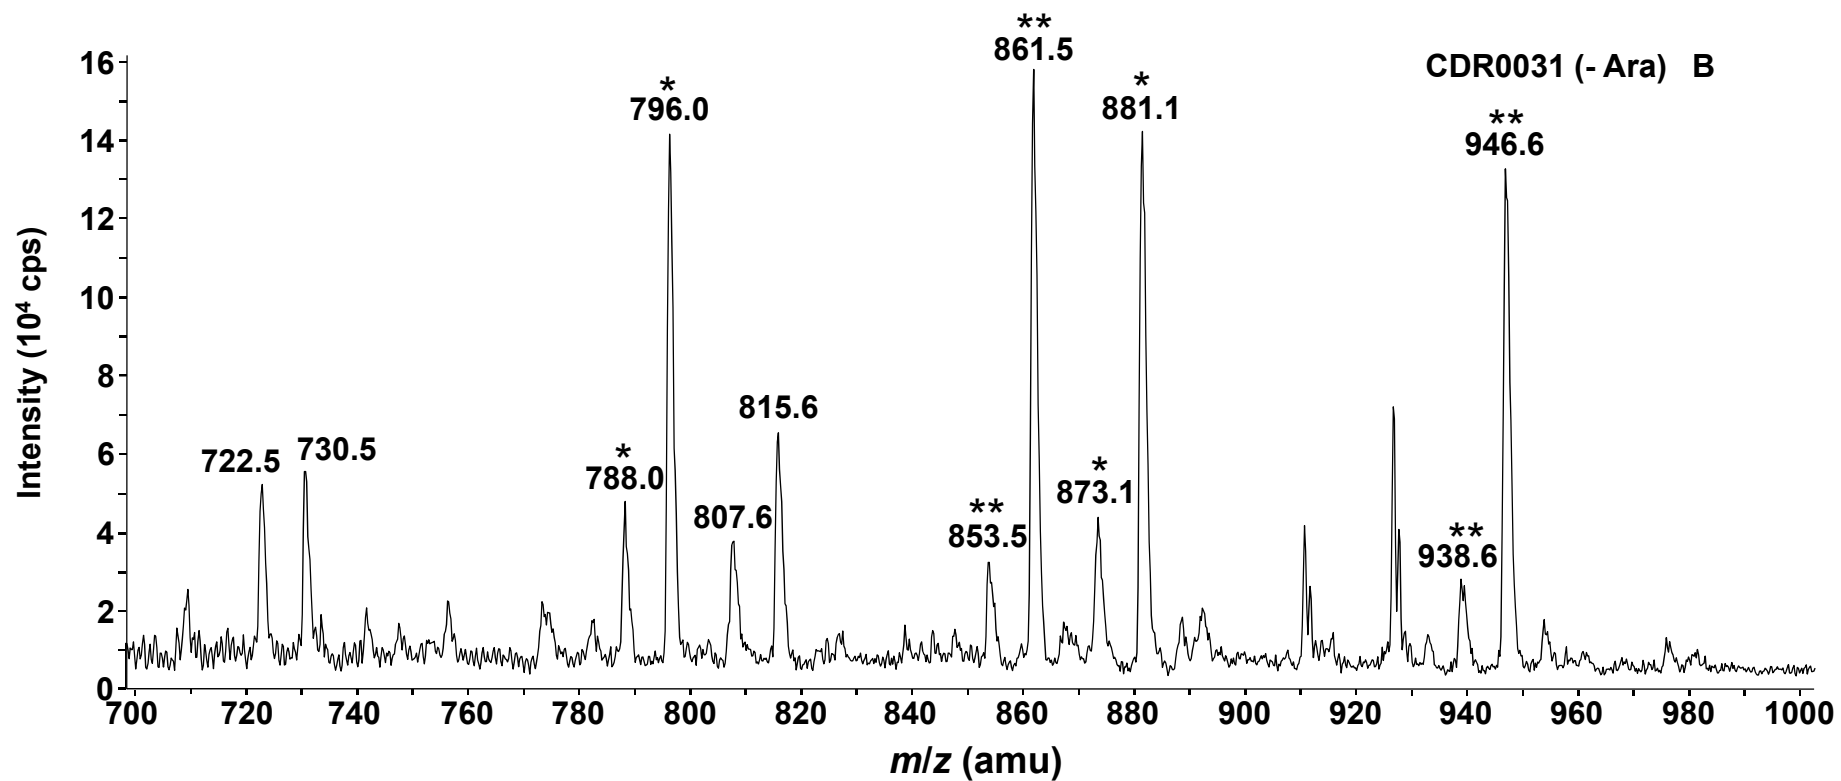

Supplement: mbo004111145sf04.pdf [file mbo004111145sf04.pdf]

Supplemental Material Figure S6.

Wildtype PAO1  
CDR0031 (-Ara)

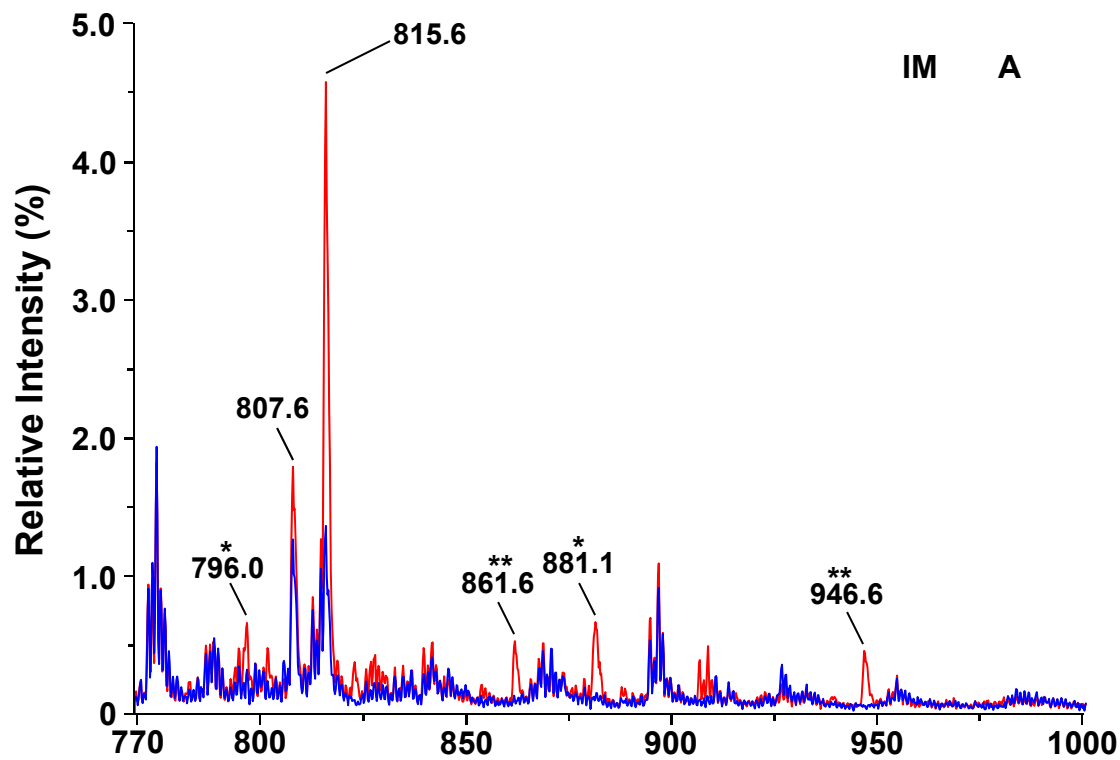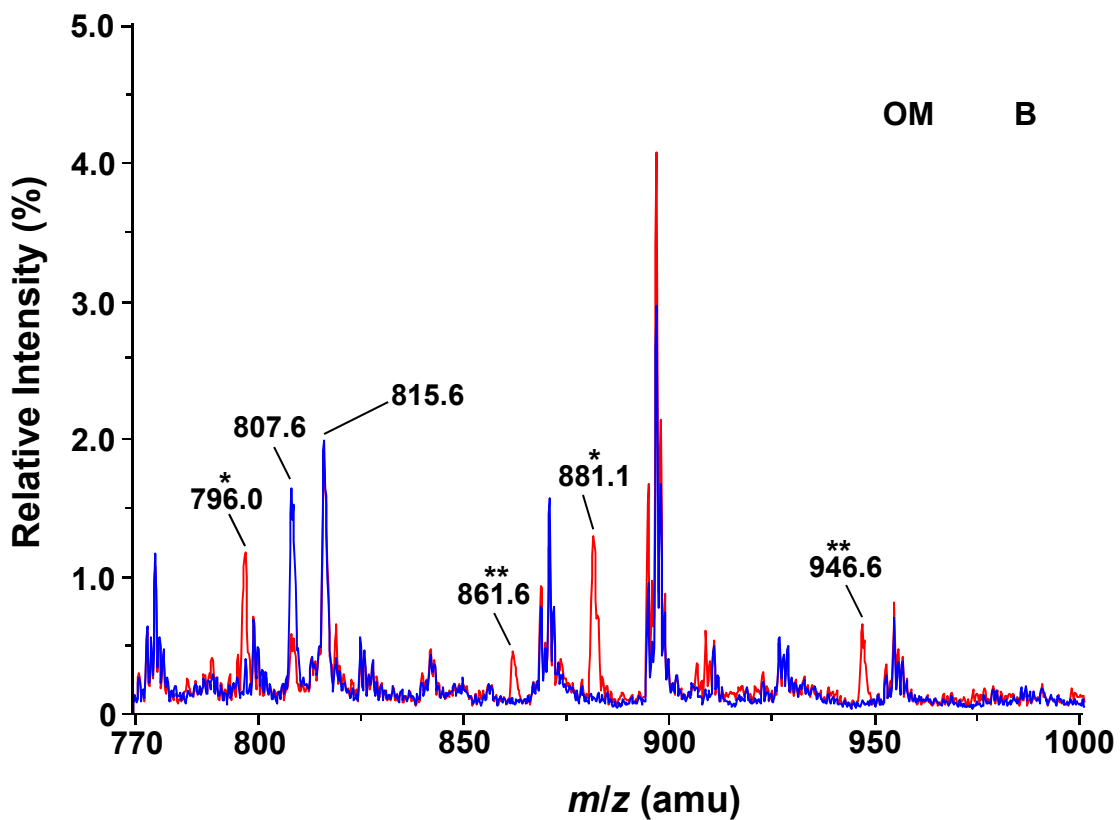

Supplement: mbo004111145sf06.pdf [file mbo004111145sf06.pdf]
